# Supplementary material
Source: PubMed Central journal article supplement (PMC4737923)
Supplement: ismej2015109x1.pdf [file ismej2015109x1.pdf]

### Arsenite oxidase large subunit

|                              | 1  | 2  | 3  | 4  | 5  | 6   | 7   | 8  | 9  | 10 | 11 |
|------------------------------|----|----|----|----|----|-----|-----|----|----|----|----|
| 1: Halorubrum sp. AJ67       |    | 95 | 93 | 87 | 85 | 69  | 69  | 67 | 33 | 28 | 33 |
| 2: Halorubrum kocurii        | 91 |    | 95 | 86 | 84 | 69  | 69  | 68 | 33 | 28 | 32 |
| 3: Halorubrum tebenquichense | 91 | 91 |    | 87 | 85 | 69  | 69  | 67 | 34 | 29 | 32 |
| 4: Halobiforma lacisalsi     | 85 | 83 | 84 |    | 82 | 69  | 69  | 66 | 33 | 28 | 31 |
| 5: Halorubrum sp. BC156      | 84 | 82 | 84 | 82 |    | 67  | 68  | 66 | 33 | 27 | 33 |
| 6: Halorubrum sp. AD156      | 73 | 71 | 71 | 72 | 71 |     | 100 | 95 | 34 | 29 | 33 |
| 7: Diamante mg Contig1       | 73 | 71 | 72 | 72 | 71 | 100 |     | 95 | 34 | 29 | 33 |
| 8: Diamante mg Contig2       | 74 | 72 | 72 | 72 | 70 | 93  | 94  |    | 32 | 28 | 32 |
| 9: Pseuvibrio sp. JE062      | 49 | 50 | 49 | 49 | 49 | 50  | 50  | 49 |    | 28 | 31 |
| 10: Pyrobaculum calidifontis | 40 | 40 | 40 | 41 | 40 | 41  | 40  | 38 | 36 |    | 42 |
| 11: Chloroflexus aurantiacus | 47 | 47 | 47 | 47 | 47 | 46  | 46  | 47 | 43 | 48 |    |

### Respiratory arsenate reductase

|                                     | 1  | 2  | 3  | 4  | 5  | 6  | 7  | 8  | 9  |
|-------------------------------------|----|----|----|----|----|----|----|----|----|
| 1: Natronobacterium gregoryi        |    | 90 | 69 | 70 | 70 | 56 | 51 | 55 | 30 |
| 2: Halobiforma nitratireducens      | 88 |    | 71 | 72 | 72 | 55 | 50 | 55 | 30 |
| 3: Halorubrum sp. AD156             | 74 | 76 |    | 60 | 97 | 52 | 49 | 52 | 28 |
| 4: Diamante mg Contig3              | 74 | 75 | 70 |    | 66 | 53 | 47 | 52 | 32 |
| 5: Diamante mg Contig4              | 74 | 76 | 94 | 71 |    | 55 | 52 | 53 | 29 |
| 6: Natranaerobius thermophilus      | 54 | 53 | 51 | 53 | 53 |    | 56 | 63 | 32 |
| 7: Alkaliphilus metalliredigens     | 53 | 52 | 51 | 51 | 52 | 64 |    | 56 | 31 |
| 8: Halarsenatibacter silvermanii    | 57 | 58 | 56 | 56 | 58 | 63 | 60 |    | 33 |
| 9: Alkalilimnicola ehrlichii (ArxA) | 50 | 51 | 51 | 50 | 51 | 41 | 41 | 45 |    |

Protein

DNA
