# Supplementary material
Source: PubMed Central journal article supplement (PMC4737923)

# CISM superfamily

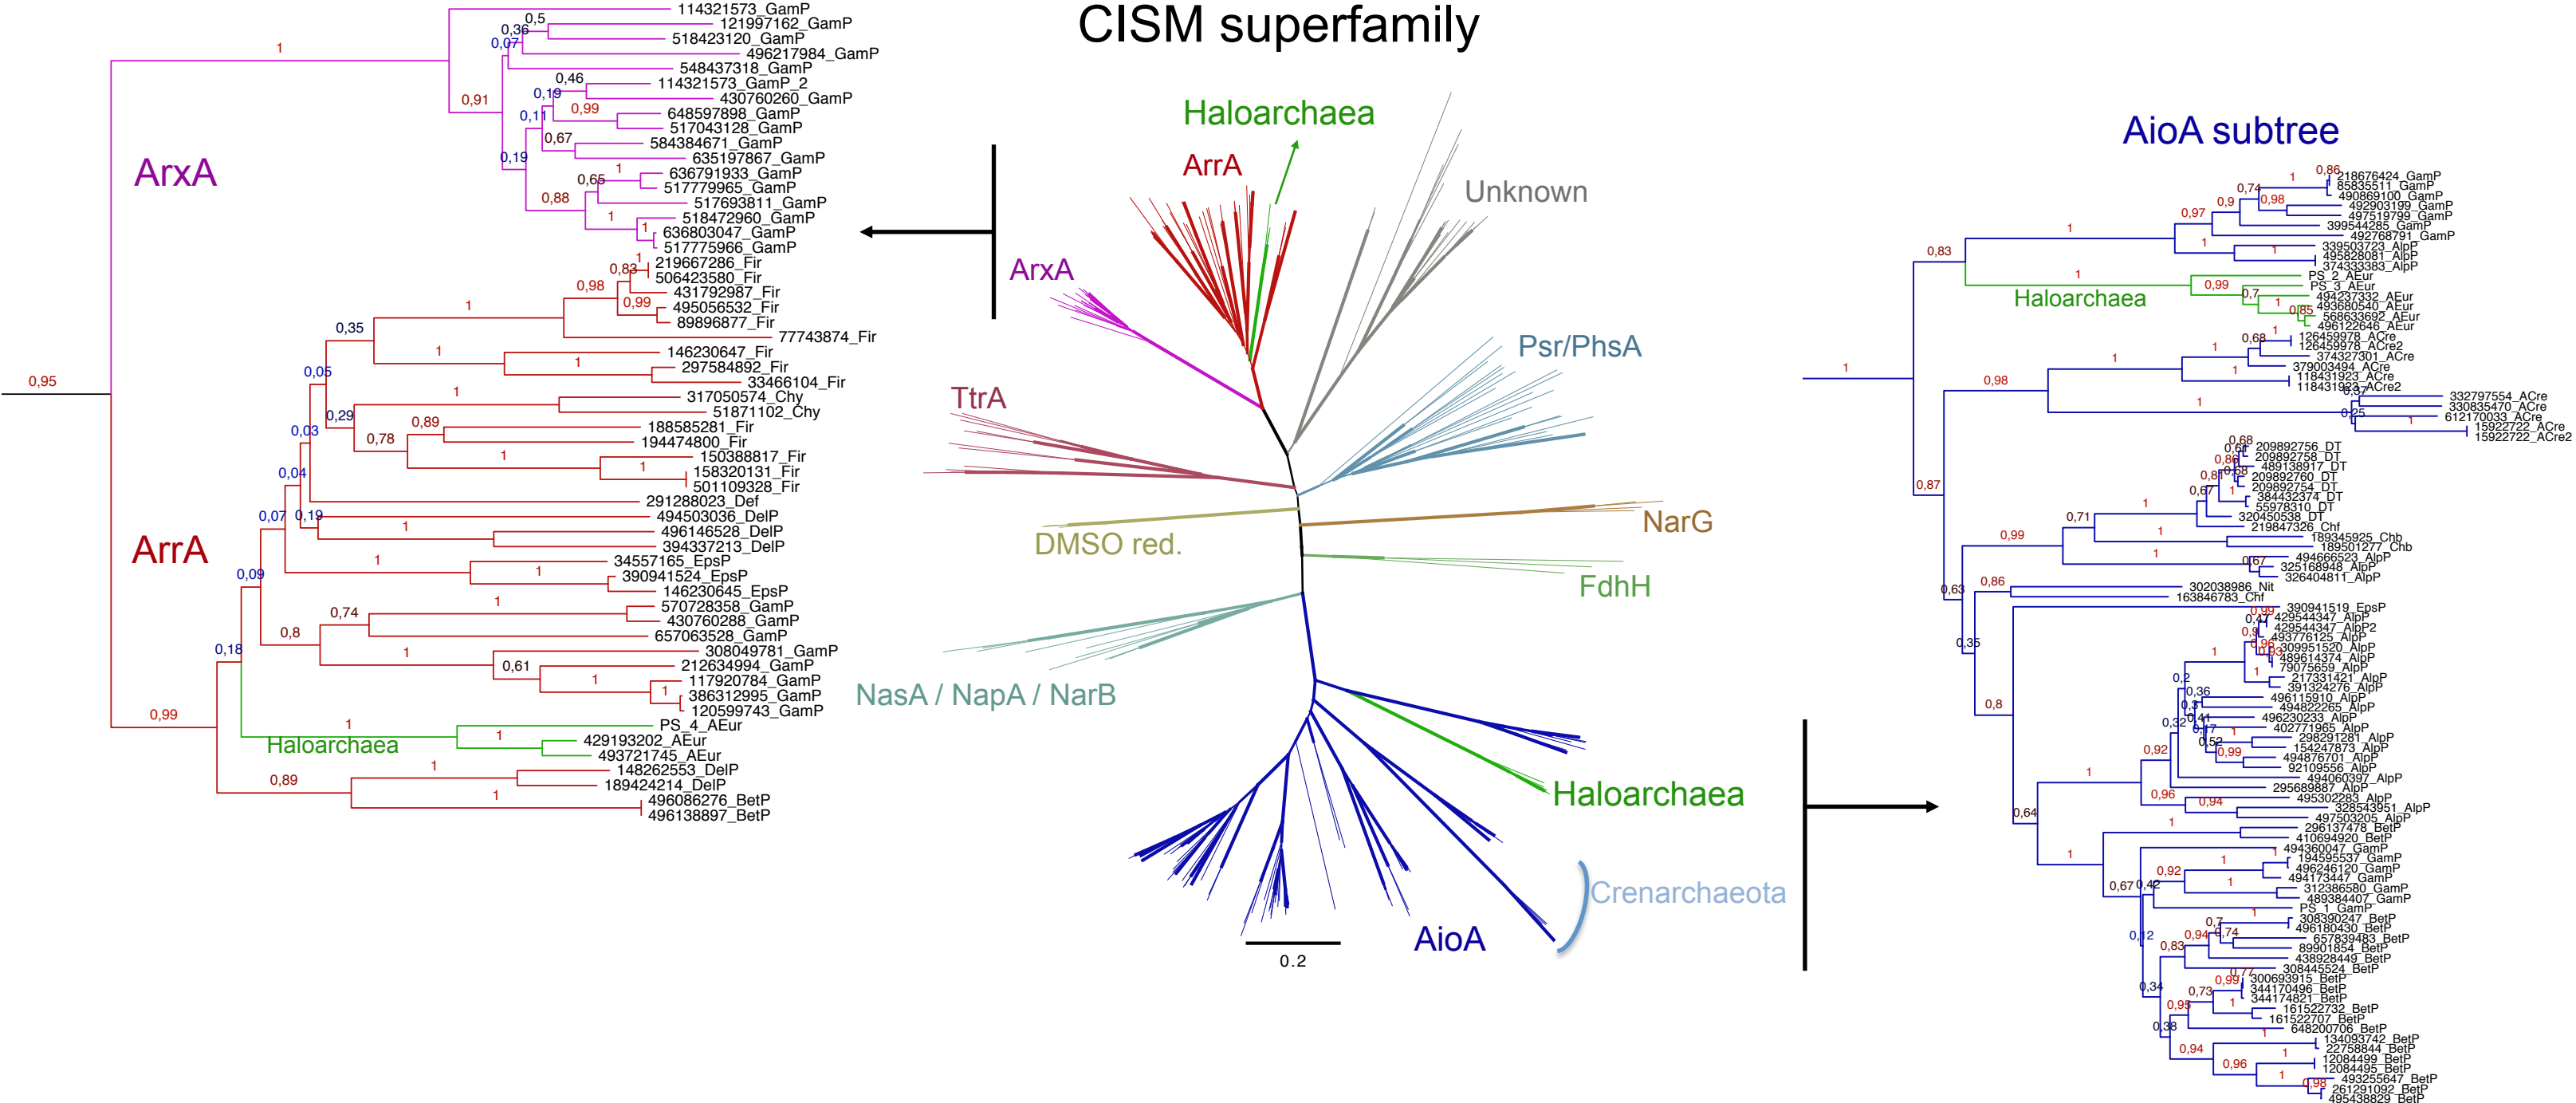

Supplement: ismej2015109x2.pdf [file ismej2015109x2.pdf]

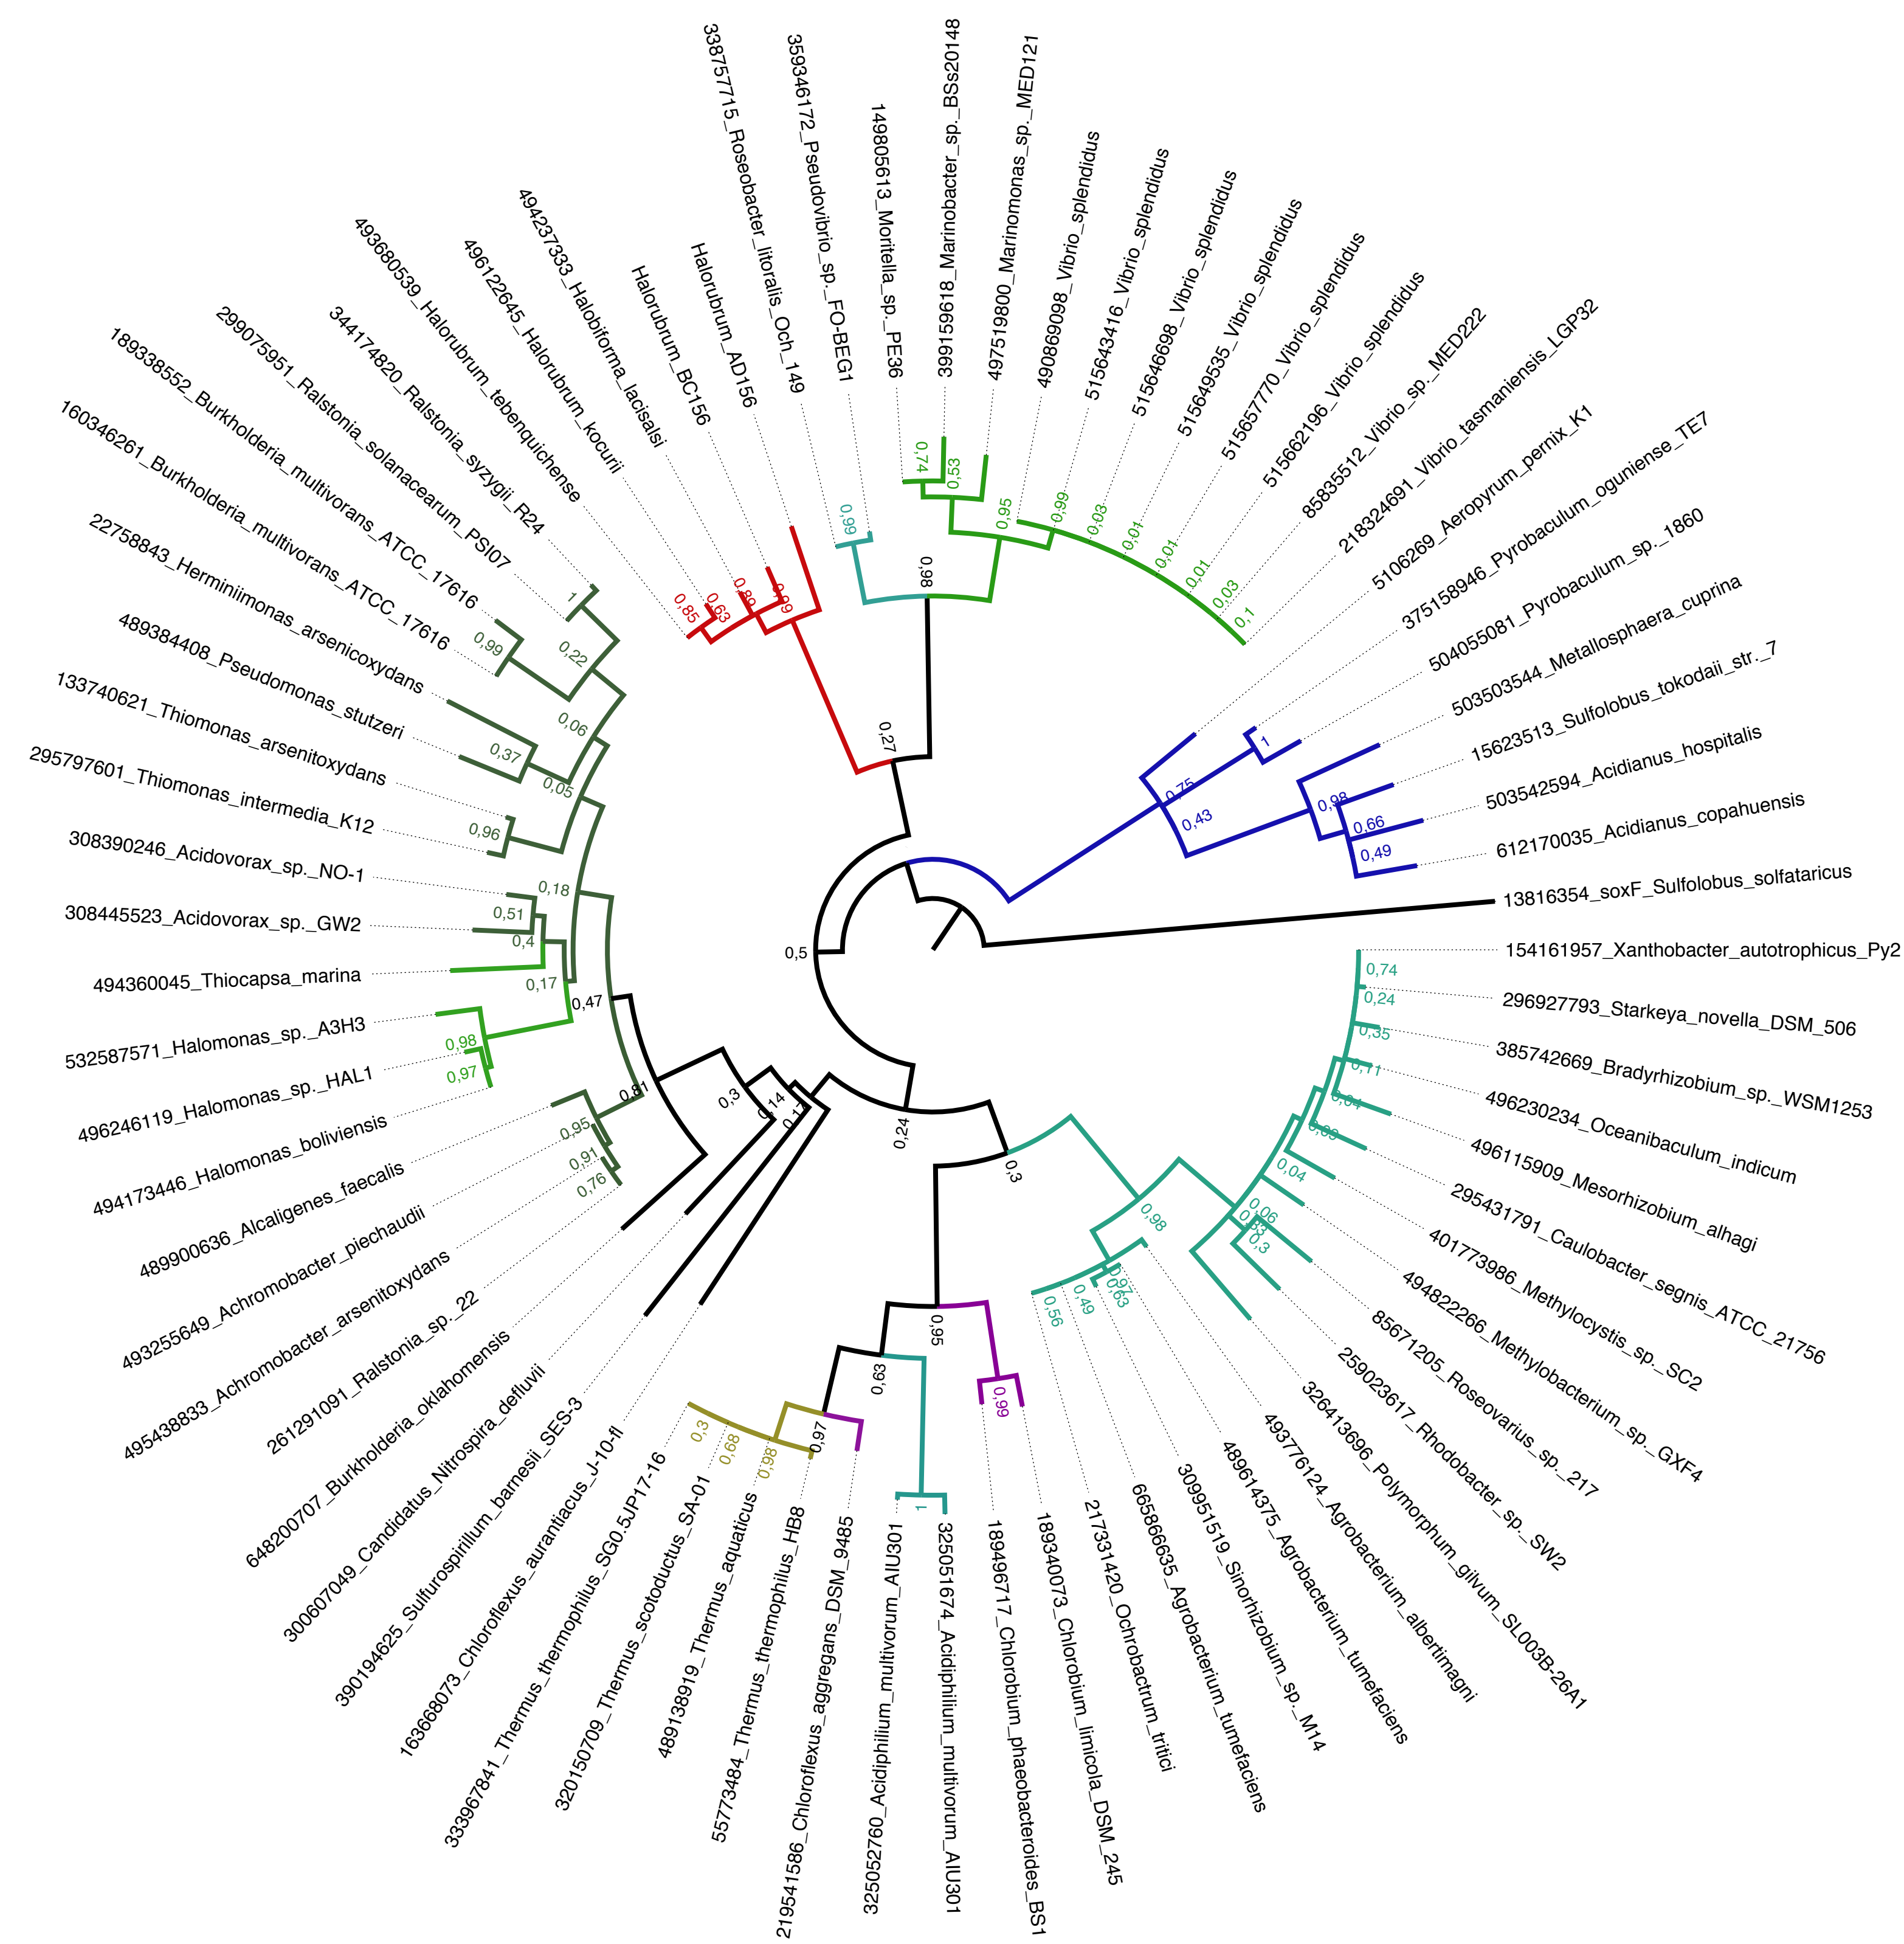

Supplement: ismej2015109x4.pdf [file ismej2015109x4.pdf]

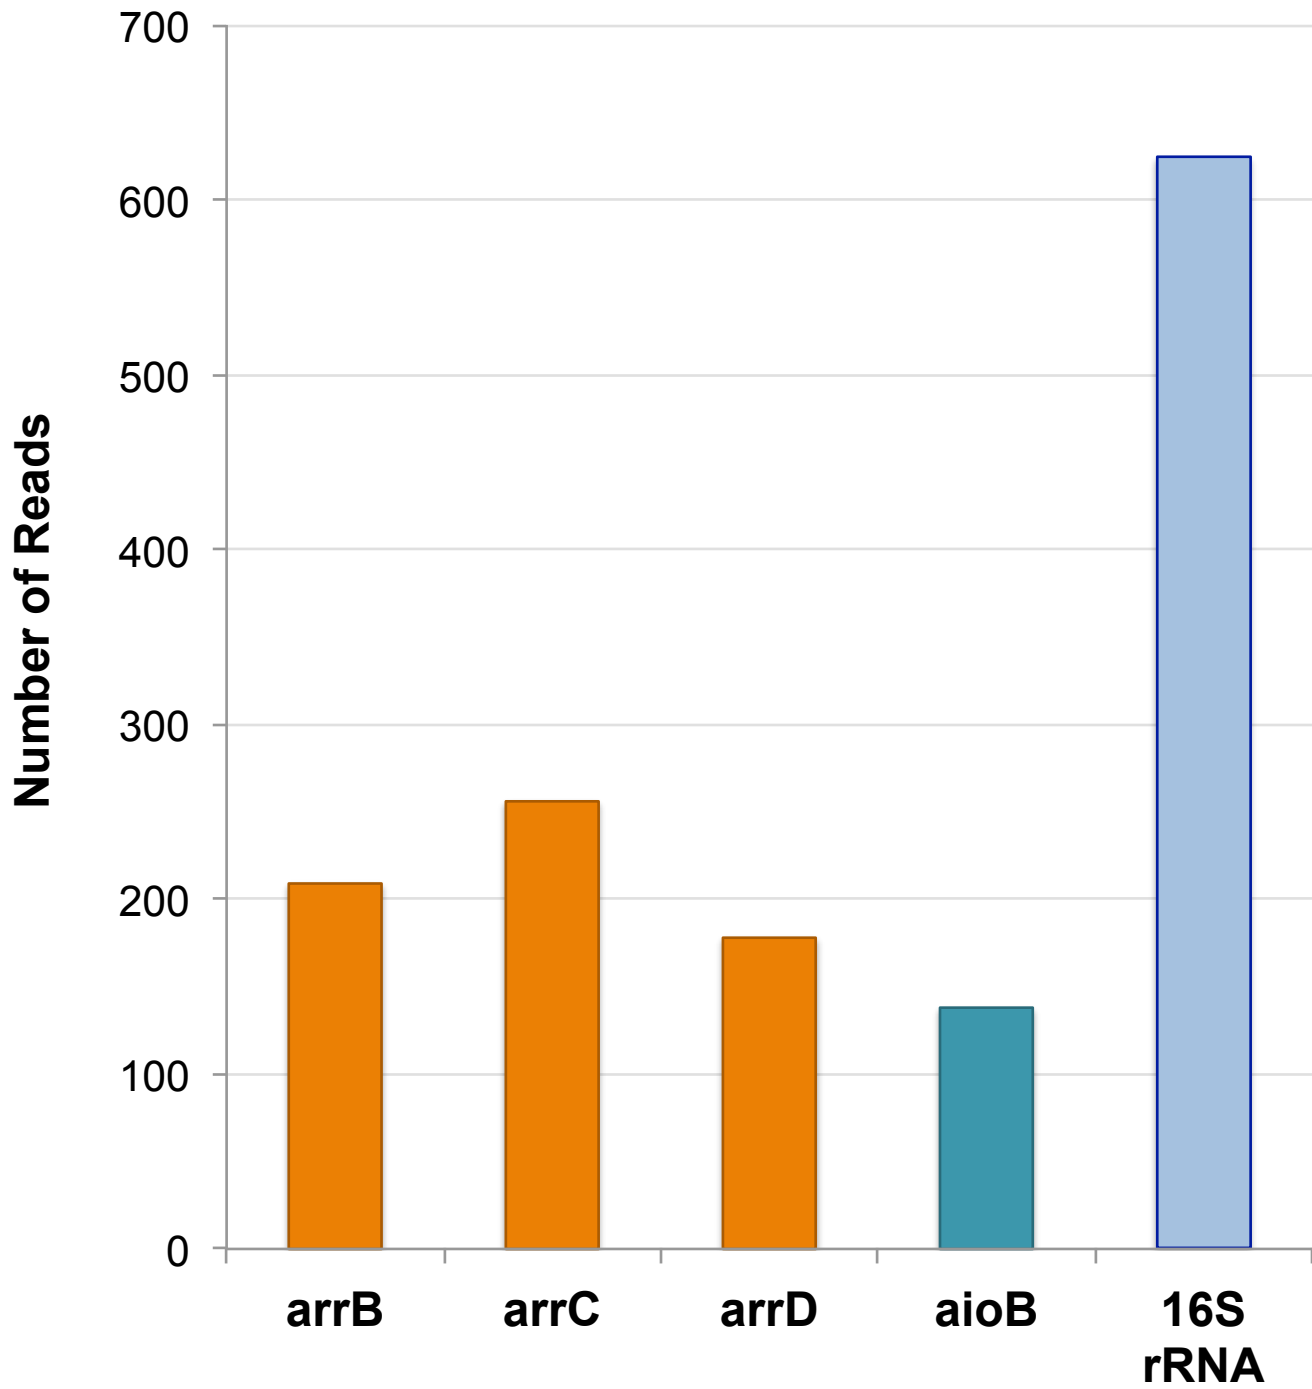

Supplement: ismej2015109x5.pdf [file ismej2015109x5.pdf]
